# Supplementary material for: A Novel Role for Connexin Hemichannel in Oxidative Stress and Smoking-Induced Cell Injury
Source: PLOS journal article supplement (doi:10.1371/journal.pone.0000712), 2007-08-07

Figure S2

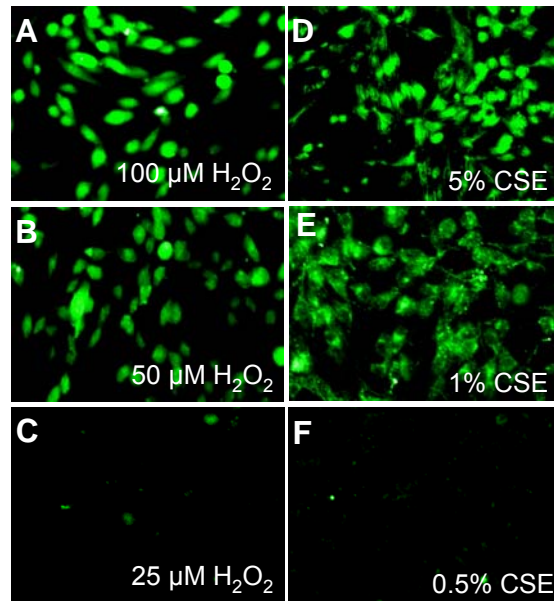

Supplement: S2 (10.1371/journal.pone.0000712.s002) [file journal.pone.0000712.s002]
