# Supplementary material for: A Novel Role for Connexin Hemichannel in Oxidative Stress and Smoking-Induced Cell Injury
Source: PLOS journal article supplement (doi:10.1371/journal.pone.0000712), 2007-08-07

Figure S4

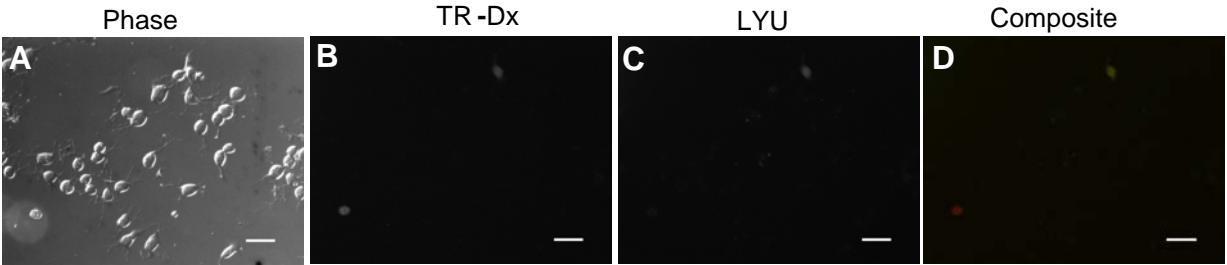

Supplement: S4 (10.1371/journal.pone.0000712.s004) [file journal.pone.0000712.s004]
